# Finding the best estimates of metabolic rates in a coral reef fish

D.G. Roche<sup>1</sup>\*, S.A. Binning<sup>1</sup>, Y. Bosiger<sup>2</sup>, J.L. Johansen<sup>2</sup> and J.L. Rummer<sup>2</sup>

<sup>1</sup> Australian Research Council Centre of Excellence for Coral Reef Studies, Division of Evolution, Ecology and Genetics, Research School of Biology, The Australian National University, Canberra ACT 0200 Australia.

<sup>2</sup> Australian Research Council Centre of Excellence for Coral Reef Studies, School of Marine and Tropical Biology, James Cook University, Townsville, Queensland 4811, Australia

\* Author for correspondence: dominique.roche@anu.edu.au

## SUMMARY

Metabolic rates of aquatic organisms are estimated from measurements of oxygen consumption rates ( $\dot{M}O_2$ ) through swimming and resting respirometry. These distinct approaches are increasingly used in eco- and conservation physiology studies; however, few studies have tested whether they yield comparable results. We examined whether two fundamental  $\dot{M}O_2$  measures, standard metabolic rate (SMR) and maximum metabolic rate (MMR), vary based on the method employed. Ten bridled monacle bream (*Scolopsis bilineatus*) were exercised using (1) a critical swimming speed ( $U_{crit}$ ) protocol, (2) a 15 min exhaustive chase protocol and (3) a 3 min exhaustive chase protocol followed by brief (1 min) air exposure. Protocol (1) was performed in a swimming respirometer whereas protocols (2) and (3) were followed by resting respirometry. SMR estimates in swimming respirometry were similar to those in resting respirometry when a three-parameter exponential or power function was used to extrapolate the swimming speed- $\dot{M}O_2$  relationship to zero swimming speed. In contrast, MMR using the  $U_{crit}$  protocol was 36% higher than MMR derived from the 15 min chase protocol and 23% higher than MMR using the 3 min chase 1 min air exposure protocol. For strong steady (endurance) swimmers, such as *S. bilineatus*, swimming respirometry can produce more accurate MMR estimates than exhaustive chase protocols because oxygen consumption is measured during exertion. However, when swimming respirometry is impractical, exhaustive chase protocols should be supplemented with brief air exposure to improve measurement accuracy. Caution is warranted when comparing MMR

estimates obtained with different respirometry methods unless they are cross-validated on a species-specific basis.

**Short title:** Estimating fish metabolic rates

**Keywords:** eco-physiology, oxygen consumption rate, maximum metabolic rate, standard metabolic rate, critical swimming speed, respirometry

## INTRODUCTION

Eco-physiology is the study of how organisms respond physiologically to environmental stressors (Fry, 1947; Fry, 1971; Schurmann and Steffensen, 1997; Claireaux and Lefrançois, 2007). Given the prevalence of anthropogenic stressors in natural systems, conservation physiology is rapidly growing as a discipline that aims to better understand and predict organisms' responses to these environmental changes (Wikelski and Cooke, 2006; Kieffer, 2010; Cooke et al., 2012). Respirometry, in particular, is increasingly used by eco-physiologists as advances in technology and equipment accessibility are facilitating studies (Kieffer, 2010), especially in less studied groups such as tropical fishes (e.g., Donelson et al., 2011; Munday et al., 2012). However, as conservation physiology and respirometry continue to grow in popularity, standardized methods must be used to ensure that physiological data are robust and comparisons among studies are valid.

In aquatic respiratory physiology, two types of respirometry chambers are commonly used to conduct either swimming (Fry and Hart, 1948; Blazka et al., 1960; Brett, 1964; Steffensen et al., 1984) or resting respirometry (Teal and Carey, 1967; Hemmingsen and Douglas, 1970; Fry, 1971). Resting respirometry is sometimes also referred to as static respirometry (e.g., Reidy et al., 2000; Brick and Cech, 2002; Barnes et al., 2011), but this terminology is much less common. Despite differences in their complexity and ease of use, both methods allow measuring oxygen consumption rates ( $\dot{M}O_2$ ) to estimate metabolic rates during or following varying levels of activity (e.g., resting vs. active swimming) (Reidy et al., 1995; Peake and Farrell, 2006; Killen et al., 2007). Different calculations can also be used within each method to compute the same estimates of metabolic rate. This probably introduces variation in metabolic rate estimates but studies have yet to carefully examine

whether data obtained in different ways produce comparable results (but see Reidy et al., 1995; Reidy et al., 2000).

Two key physiological parameters characterize the upper and lower bounds of a fish's capacity to uptake oxygen: standard (resting) metabolic rate (SMR or  $\dot{M}O_{2,min}$ ), and maximum metabolic rate (MMR or  $\dot{M}O_{2,max}$ ). SMR corresponds to the minimum maintenance metabolism of a resting fish in a post absorptive state (Fry, 1971; Brett and Groves, 1979; Schurmann and Steffensen, 1997), whereas MMR corresponds to a fish's maximum rate of oxygen consumption (Fry, 1971; Beamish, 1978; Schurmann and Steffensen, 1997; Korsmeyer and Dewar, 2001; Clark et al., 2011). During exercise, MMR is measured at a fish's maximum swimming speed during prolonged swimming (Bushnell et al., 1994; Schurmann and Steffensen, 1997; Korsmeyer and Dewar, 2001), which requires anaerobic metabolism and typically ends in fatigue within 200 min (Beamish, 1978; Peake and Farrell, 2004). In contrast, active metabolic rate (AMR) is a term describing the oxygen consumption rate of fish at their maximum sustained swimming speed ( $U_{max}$ ). Unlike prolonged swimming, sustained swimming can be maintained for > 200 min and is powered solely by aerobic metabolism (Beamish, 1978; Peake and Farrell, 2004). Beyond  $U_{max}$ , fish generally engage in burst-and-coast swimming and  $\dot{M}O_2$  begins to asymptote (Sepulveda and Dickson, 2000; Claireaux et al., 2006). As a result, MMR often slightly exceeds AMR since fish are forced to swim beyond their maximum sustained swimming speed for a limited time (Bushnell et al., 1994; Schurmann and Steffensen, 1997). Once measured, SMR and MMR can be used to calculate a fish's aerobic scope for activity (AS), which determines the range of metabolic energy available for aerobic activities (Fry, 1947; Bushnell et al., 1994; Cutts et al., 2002; Claireaux and Lefrançois, 2007; Clark et al., 2011). SMR and MMR exclude metabolic activities powered anaerobically because anaerobic metabolism cannot be measured directly through oxygen consumption at the time of exercise (Korsmeyer and Dewar, 2001).

In swimming respirometry, the most common means of estimating a fish's metabolic rate is using a critical swimming speed ( $U_{crit}$ ) protocol such as the one initially developed by Brett (1964) (Reidy et al., 1995; Plaut, 2001; Farrell, 2007). Fish are made to swim against a laminar water flow in a swimming respirometer while water velocity is increased incrementally, at regular intervals, until the fish fatigues. The  $U_{crit}$  is the swimming speed at which fish become exhausted and stop swimming. Because oxygen consumption is measured

continuously while fish are exercised to exhaustion, swimming respirometry is thought to provide a very accurate estimate of MMR (Farrell and Steffensen, 1987; Plaut, 2001; Shultz et al., 2011). In contrast, SMR is not directly measured using this method, but can be calculated by extrapolating the non-linear swimming speed- $\dot{M}O_2$  relationship to a swimming speed of zero (Bushnell et al., 1994; Reidy et al., 2000; Korsmeyer and Dewar, 2001; Korsmeyer et al., 2002; Binning et al., 2013). Despite many advantages of this method for measuring MMR,  $U_{crit}$  protocols can be time consuming and species that are poor swimmers (e.g., ambush predators) often lack the motivation to swim in a respirometer (Peake and Farrell, 2006).

To circumvent the limitations of swimming respirometers, exhaustive chase protocols have been developed to estimate MMR whereby fish are manually chased to exhaustion (Black, 1958; Milligan, 1996; Kieffer, 2000) and immediately placed into a resting respirometer (Cutts et al., 2002; Jordan and Steffensen, 2007; Norin and Malte, 2011). Variations of this method also exist in which fish are briefly held out of the water after chasing (Ferguson and Tufts, 1992; Donaldson et al., 2010; Clark et al., 2012). Air exposure contributes to increasing metabolic demands and has been argued to simulate exercise stress associated with catch-and-release fisheries, where fish are temporarily held out of the water to allow hook removal (Donaldson et al., 2010; Clark et al., 2012). Because the volume of resting respirometers is generally small relative to the size of the fish, individuals tend to remain immobile in the chamber and MMR is measured during recovery from exercise/chasing (Steffensen, 2005). This method relies on post-exercise oxygen consumption rates and MMR therefore corresponds to the sum of the fish's routine metabolic rate (RMR;  $\dot{M}O_2$  during activities that elevate SMR (Schurmann and Steffensen, 1997; Steffensen, 2005)) and excess post-exercise oxygen consumption (EPOC) to repay the oxygen debt incurred from anaerobic metabolism during chasing (Killen et al., 2007). One major advantage of using resting respirometry is that SMR can be measured while fish have remained inactive in the chamber for several hours (typically between 2 to 24 hours, depending on the species), thus allowing both SMR and MMR to be calculated in one trial (Cutts et al., 2001; Brick and Cech, 2002; Cutts et al., 2002; Nilsson and Ostlund-Nilsson, 2004; Nilsson et al., 2009; Nilsson et al., 2010; Donelson et al., 2011; Norin and Malte, 2011; Clark et al., 2012).

Some studies suggest or anecdotally report that similar MMR measurements can be obtained using both exhaustive chase protocols and  $U_{crit}$  protocols (e.g., Killen et al., 2007;

Gingerich et al., 2010). However, a comprehensive comparison of key metabolic parameters measured with different respirometry methods has yet to be conducted. Here, we compare data obtained using three common methods of measuring SMR and MMR in fishes: (1) a traditional  $U_{crit}$  protocol, (2) an exhaustive chase protocol by manual chasing, and (3) an exhaustive chase protocol by manual chasing followed by brief (1 min) air exposure.  $\dot{M}O_2$  measurements for protocol (1) were carried out in a swimming respirometer whereas measurements for protocols (2) and (3) were performed in resting respirometers.

## MATERIAL AND METHODS

### Study site and species

We chose the coral reef fish *Scolopsis bilineatus* (Nempiteridae) for this study due to its high abundance on the Great Barrier Reef (Boaden and Kingsford, 2012; Roche et al., In press), adequate size relative to the respirometry equipment used, and amenable behaviour in the swimming respirometer (Binning et al., 2013). Adult fish were collected by divers using barrier and hand nets between February and March 2012 from reefs surrounding Lizard Island, on the northern Great Barrier Reef, Australia (14° 40' S; 145° 28' E). Fish were transported live in buckets to the aquarium facilities at the Lizard Island Research Station within two hours of capture and held in individual aquaria (40.0W× 29.0L× 18.0H cm) with a flow-through water system directly from the reef. Fish were fed once daily with pieces of raw prawn (mean wet weight approx. 1g) and maintained in aquaria for a minimum of three days before the respirometry trials. Length measurements for individual fish were obtained by holding each fish in a plastic bag half-filled with water and measuring total length (TL), body width and body depth with handheld callipers. Body mass (M) was measured directly on a balance. Fish were fasted for 24h prior to the experimental trials (Johansen and Jones, 2011; Shultz et al., 2011) to evacuate the digestive tract and standardize a post-absorptive state that maximizes energy availability for swimming (Niimi and Beamish, 1974). Ten fish (TL= 17.6 ± 0.4 cm; M = 97.0 ± 7.7 g; mean ± s.d.) were subjected to each of three protocols in a random order: a critical swimming speed ( $U_{crit}$ ) trial (Brett, 1964; Beamish, 1978; Eliason et al., 2011; Johansen and Jones, 2011), a 15 min exhaustive chase trial (see Cutts et al., 2002; Killen et al., 2007; Fu et al., 2009; Norin and Malte, 2011; Shultz et al., 2011), and a three minute exhaustive chase followed by one minute air exposure trial (Ferguson and Tufts, 1992; Donaldson et al., 2010; Clark et al., 2012). The same fish (n=10) were subjected to each protocol following a repeated measures design (Reidy et al., 1995) to minimize inter-

individual variation in metabolic rates. Fish were fed and allowed a minimum of 48 hours to recover between trials. Prior to trials, individuals were starved for at least 24 h, but never more than 36 h. In all three protocols, oxygen consumption rates were measured using intermittent-flow respirometry (Steffensen et al., 1984; Steffensen, 1989).

### Swimming respirometry

Swimming trials were carried out in an 11.9 L Loligo flow tank respirometer (swim chamber dimensions 40.0L × 10.0W × 10.0H cm) filled with well-aerated, filtered and UV-sterilized seawater and maintained at a constant temperature of  $28 \pm 0.1^\circ\text{C}$  (mean  $\pm$  actual range). Oxygen levels in the respirometer were recorded using a Fibox 3 fiber optic oxygen meter (PreSens, Regensburg, Germany) online feed into the AutoResp 1 Software (Loligo Systems, Copenhagen, Denmark). Flow in the working section of the respirometer was calibrated using a digital TAD W30 flow-meter (Höntzsch, Waiblingen, Germany). Solid blocking effects of the fish in the working section were corrected by the respirometry software (AutoResp, Loligo Systems, Copenhagen, Denmark) following Bell & Terhune (1970). We used 10 min determination periods with a 240s flush, 60s wait and 300s measurement cycle (Binning et al., 2013). Once an individual's length and mass were inputted into the software, three determinations were run without fish to measure initial background rates of respiration from bacterial load in the test chamber. The fish was then placed in the respirometer and left to habituate to the chamber for six to eight hours at a swimming speed of  $0.75 \text{ BLs}^{-1}$  until oxygen consumption rates stabilized (Johansen et al., 2010; Binning et al., 2013). This speed corresponded to the lowest water flow necessary to ensure constant swimming and minimize spontaneous activity in this species. To start the trial, the flow speed was slowly increased to  $1.25 \text{ BL s}^{-1}$  and maintained constant for three  $\dot{M}\text{O}_2$  determinations (see Brett, 1964). Flow speed was incrementally increased by  $0.5 \text{ BL s}^{-1}$  every three determinations for the duration of the experiment. Trials were complete when fish could no longer maintain their position in the swim chamber and were forced to rest against the back grid of the chamber ( $U_{\text{crit}}$ ) for  $> 5\text{ s}$  (Johansen and Jones, 2011). The time and speed was recorded and the water flow was reduced to  $0.75 \text{ BL s}^{-1}$  to ensure the fish's recovery from oxygen debt. We calculated  $U_{\text{crit}}$  following Brett (1964):

$$U_{\text{crit}} = U + U_i * (t/t_i) \quad (1)$$



where  $U$  is the penultimate swimming speed before the fish fatigued and stopped swimming;  $U_i$  is the swimming speed at which the fish was unable to continue swimming;  $t$  is the length of time the fish swam at the final swimming speed where fatigue occurred;  $t_i$  is the amount of time fish were swam at each speed interval (i.e., 30 min). The fish was then removed from the test chamber and returned to its holding tank. Three additional determinations were run to measure final background rates of respiration in the chamber. Background oxygen consumption rates at the end of each cycle were determined from the slope of the linear regression between initial and final background rates, and were subtracted from each  $\dot{M}O_2$  determination. All slopes aside from background respiration rates had an  $r^2$  greater than 0.97. To reduce bacterial growth and respiration in the chamber, the respirometer was drained and rinsed in freshwater when the background consumption rates exceeded 15% of the resting metabolic rate of the fish.

We calculated oxygen consumption rate at  $U = 0.75 \text{ BL s}^{-1}$  following three different methods commonly used in swimming respirometry studies: (1) by averaging the three lowest  $\dot{M}O_2$  measurements ( $SMR_{\text{swim\_low}}$ ) before increasing  $U$  to  $1.25 \text{ BL s}^{-1}$  (Schurmann and Steffensen, 1997); (2) by averaging the three last  $\dot{M}O_2$  measurements ( $SMR_{\text{swim\_last}}$ ) immediately before increasing  $U$  to  $1.25 \text{ BL s}^{-1}$  (Binning et al., 2013); and (3) by generating a frequency distribution of  $\dot{M}O_2$  (bin size =  $5 \text{ mg O}_2 \text{ kg}^{-1} \text{ h}^{-1}$ ) at  $U = 0.75 \text{ BL s}^{-1}$  and averaging values in the lowest mode ( $SMR_{\text{swim\_hist}}$ ) to exclude elevated values resulting from spontaneous activity (Steffensen et al., 1994; Korsmeyer et al., 2002; Jordan and Steffensen, 2007; Svendsen et al., 2012). For this third method, a double normal distribution was fitted to a frequency histogram of the raw  $\dot{M}O_2$  data: elevated values of  $\dot{M}O_2$  corresponding to the first normal distribution were excluded and the second normal distribution with lower  $\dot{M}O_2$  values was used to provide an estimate of  $\dot{M}O_2$  at  $U = 0.75 \text{ BL s}^{-1}$ . We averaged three  $\dot{M}O_2$  measurements in (1) and (2) for consistency with  $\dot{M}O_2$  calculations at higher swimming speeds. Oxygen consumption rate ( $\dot{M}O_2$ ) was then plotted against swimming speed ( $U$ ) to produce an oxygen consumption curve, including only speeds that resulted exclusively in aerobic activity (i.e., from  $U = 0.75$  to  $U = 3.25 \text{ BL s}^{-1}$ ). The onset of anaerobic activity was determined as the swimming speed when fish transitioned gait from steady to unsteady (bursting-and-coasting) swimming (Peake and Farrell, 2004). Bursting and coasting was defined when the fish used caudal fin beats (typically 1, 2 or 3 beats) and a subsequent forward glide motion  $>5 \text{ cm}$ . Standard metabolic rate (SMR) was obtained by extrapolating the curve to  $U = 0 \text{ BL s}^{-1}$  (Steffensen et al., 1994; Schurmann and Steffensen, 1997;

Korsmeyer et al., 2002) using either a traditional exponential function (Brett, 1964; Webb, 1975; Korsmeyer et al., 2002; Binning et al., 2013) with two (equation 2) or three (equation 3) parameters, or the hydrodynamics-based power function with three-parameters (equation 4) (Wu, 1977; Videler, 1993; Korsmeyer et al., 2002; Johansen et al., 2010; Svendsen et al., 2010).

$$\dot{M}O_2 = a10^{bU} \quad (2)$$

$$\dot{M}O_2 = a + b10^{cU} \quad (3)$$

$$\dot{M}O_2 = a + bU^c \quad (4)$$

Therefore, for each of the three different functional forms, three SMR estimates were obtained ( $SMR_{swim\_low}$ ,  $SMR_{swim\_last}$ ,  $SMR_{swim\_hist}$ ) following different calculations of  $\dot{M}O_2$  at  $U = 0.75 \text{ BL s}^{-1}$ . Maximum metabolic rate ( $MMR_{swim}$ ) was measured at the maximum swimming speed where fish completed at least one 10 min  $\dot{M}O_2$  determination; we averaged  $\dot{M}O_2$  values when fish completed more than one determination (up to three determinations).

## Resting respirometry

Resting respirometry differs from swimming respirometry in that resting chambers are simpler and more affordable, allowing the benefit of testing multiple fish simultaneously. Individual chambers are connected to flush pumps that turn on intermittently after each  $\dot{M}O_2$  determination to replenish the chamber with oxygenated seawater; a closed-loop recirculation pump also mixes the water inside the chamber during  $\dot{M}O_2$  determinations. Our resting respirometry system consisted of four darkened cylindrical chambers 3.48 L in volume, fitted with fiber optic oxygen probes and immersed in a temperature-controlled aquarium (100 x 52 x 49 cm; length x width x height) filled with aerated seawater. The water temperature was maintained at  $28 \pm 0.5^\circ\text{C}$  (mean  $\pm$  actual range) and dissolved oxygen concentration was recorded with a four channel FireSting O<sub>2</sub> Optical Oxygen Meter (Pyroscience, Aachen, Germany). We used two different methods to estimate MMR. The first consisted of a 15 min exhaustive chase trial in which individual fish were placed in a 110 cm diameter circular tank and chased continuously with a 20 mm diameter pvc tube until exhaustion (i.e., all fish became unresponsive within 12-15 min) (see Cutts et al., 2002; Fu et al., 2006; Killen et al., 2007; Fu et al., 2009; Norin and Malte, 2011). The experimenter would only touch the tail of the fish if it slowed down or stopped swimming. Fish swam primarily with their caudal fin, occasionally bursting-and-coasting. The second method consisted of a 3 min exhaustive chase



followed by 1 min of air exposure (Ferguson and Tufts, 1992; Donaldson et al., 2010; Clark et al., 2012). Fish were chased in an identical manner and subsequently maintained out of the water in a rubber mesh net for 1 min. Following either procedure, each fish was immediately placed in a resting respirometry chamber and their oxygen consumption measured for 5 min. The measurement period started within 10 s from cessation of chasing for the 15 min chase protocol, and 10 s following the end of air exposure for the 3 min chase 1 min air exposure protocol. This  $\dot{M}O_2$  measurement corresponded to the maximum metabolic rate:  $MMR_{chase}$  or  $MMR_{air}$ , depending on the method employed. Subsequently,  $\dot{M}O_2$  was measured continuously following a 10 min measurement and 10 min flush cycle. SMR was obtained by leaving the fish in the chamber overnight between 6 and 12 hours, and calculated in one of three ways: (1) by averaging the three lowest  $\dot{M}O_2$  measurements recorded ( $SMR_{rest\_low}$ ); (2) by averaging the three last  $\dot{M}O_2$  measurements recorded ( $SMR_{rest\_last}$ ); and (3) by generating a frequency distribution of all  $\dot{M}O_2$  measurements recorded (bin size = 5 mg O<sub>2</sub> kg<sup>-1</sup> h<sup>-1</sup>) and averaging values in the lowest mode ( $SMR_{rest\_hist}$ ). Previous resting respirometry studies have averaged either three (Cutts et al., 2001; Brick and Cech, 2002; Cutts et al., 2002) or six  $\dot{M}O_2$  measurements to obtain SMR estimates (Schurmann and Steffensen, 1997; Gingerich et al., 2010; Norin and Malte, 2011; Shultz et al., 2011). We chose to average three measurements for consistency with  $\dot{M}O_2$  calculations in the  $U_{crit}$  protocol. Oxygen consumption rate ( $\dot{M}O_2$  in mg O<sub>2</sub> kg<sup>-1</sup> h<sup>-1</sup>) was calculated with LabChart v. 6.1.3 (ADInstruments, Dunedin, New Zealand) as the slope of the linear regression of oxygen concentration decline over time for each determination cycle using the equation (Bushnell et al., 1994; Schurmann and Steffensen, 1997):

$$\dot{M}O_2 = sV_{resp}\alpha M^{-1} \quad (5)$$

where  $s$  is the slope (mmHg h<sup>-1</sup>),  $V_{resp}$  is the volume of the respirometer minus the volume of the fish (L),  $\alpha$  is the solubility of oxygen in water (μgO<sub>2</sub> L<sup>-1</sup> mmHg<sup>-1</sup>) adjusted for temperature and barometric pressure and  $M$  is the mass of the fish (kg). Three determinations were run before and after each trial to measure background rates of bacterial respiration in individual chambers, which were subtracted from  $\dot{M}O_2$  values upon calculation. The system was rinsed in freshwater every third day to insure that background oxygen consumption rates remained below 15% of the resting metabolic rate of fish.

### Statistical analysis

We used a linear mixed effects model (LMM; lme function in R) to compare values of maximum metabolic rate ( $MMR_{swim}$ ,  $MMR_{chase}$ ,  $MMR_{air}$ ). We used a second LMM to compare SMR estimates obtained in resting respirometry ( $SMR_{rest\_low}$ ,  $SMR_{rest\_last}$ ,  $SMR_{rest\_hist}$ ) with those obtained in swimming respirometry ( $SMR_{swim\_low}$ ,  $SMR_{swim\_last}$ ,  $SMR_{swim\_hist}$ ) using three different functional forms to describe the relationship between swimming speed and  $\dot{M}O_2$  (i.e., a two-parameter exponential function, a three-parameter exponential function and a three-parameter power function). Linear mixed models can be used to reduce inter-individual variation in metabolic rates and control for the non-independence of data points obtained on the same individuals (Bolker et al., 2009). Diagnostic plots and Shapiro-Wilk's test were used to ensure that the data met the assumptions of the models. We compared the fit of non-linear relationships by computing the proportion of variance explained. All analyses were performed in R v2.11.1 (R Development Core Team, 2010).

## RESULTS

The mean ( $\pm$  s.e.m.) critical swimming speed for all fish was  $3.76 \pm 0.10$  BL  $s^{-1}$ , whereas the mean ( $\pm$  s.e.m.) maximum swimming speed at which fish completed at least one 10 min  $\dot{M}O_2$  determination was  $3.85 \pm 0.10$  BL  $s^{-1}$ . At  $4.25$  BL  $s^{-1}$ , only three out of ten fish completed one  $\dot{M}O_2$  determination.  $MMR$  differed according to the respirometry method employed (LMM;  $F_{2,18} = 19.2$ ,  $p < 0.001$ ; Fig. 1A,B):  $MMR_{swim}$  was 36% higher than  $MMR_{chase}$  (estimate = -167.69, 95% CI = -221.35 to -114.03,  $t = -6.13$ ,  $p < 0.001$ ) and 23% higher than  $MMR_{air}$  (estimate = -107.15, 95% CI = -160.81 to -53.49,  $t = -3.91$ ,  $p = 0.001$ ).  $MMR_{air}$  was significantly higher than  $MMR_{chase}$  (estimate = 60.54, 95% CI = 6.88 to 114.20,  $t = 2.21$ ,  $p = 0.04$ ; Figs 2B, 3A).

SMR estimates obtained in resting respirometry differed based on the calculation method used:  $SMR_{rest\_low}$  was significantly lower than  $SMR_{rest\_last}$  (estimate = 23.75, 95% CI = 6.71 to 40.78,  $t = 2.73$ ,  $p < 0.01$ ) but not different from  $SMR_{rest\_hist}$  (estimate = 7.84, 95% CI = -9.19 to 24.87,  $t = 0.90$ ,  $p > 0.3$ ); there was no significant difference between  $SMR_{rest\_last}$  and  $SMR_{rest\_hist}$  (estimate = -15.91, 95% CI = -32.94 to 1.12,  $t = -1.83$ ,  $p = 0.07$ ) (Fig. 2A,B). In contrast, when calculated for each of the three functional forms, SMR estimates obtained in swimming respirometry did not differ significantly, irrespective of the calculation method employed (LMM; all  $p$  values  $> 0.05$ ; Fig. 2B).

Fitting a two-parameter exponential function produced SMR estimates 25% lower, on average, than the lowest SMR estimate obtained in resting respirometry (LMM; contrast group =  $\text{SMR}_{\text{rest\_low}}$ ;  $\text{SMR}_{\text{swim\_low}}$  estimate = -27.49, 95% CI = -44.59 to -10.39,  $t = -3.15$ ,  $p = 0.004$ ;  $\text{SMR}_{\text{swim\_last}}$  estimate = -24.29, 95% CI = -41.40 to -7.19,  $t = -2.78$ ,  $p = 0.01$ ;  $\text{SMR}_{\text{swim\_hist}}$  estimate = -22.37, 95% CI = -39.47 to -5.27,  $t = -2.56$ ,  $p = 0.016$ ). Alternatively,  $\text{SMR}_{\text{rest\_low}}$  did not differ from  $\text{SMR}_{\text{swim\_low}}$  when we fit a three-parameter exponential function or a three-parameter power function to the swimming speed- $\dot{M}\text{O}_2$  relationship (LMM; all  $p$  values  $> 0.05$ ; Table 1; Fig. 2B). When using either a three-parameter exponential or power function, most differences between SMR obtained in resting versus swimming respirometry occurred between  $\text{SMR}_{\text{rest\_last}}$  and  $\text{SMR}_{\text{swim\_last}}$  (Table 1; Fig. 2B); there were very few significant differences between  $\text{SMR}_{\text{rest\_hist}}$  and  $\text{SMR}_{\text{swim\_hist}}$  (Table 1; Fig. 2B). Including  $\dot{M}\text{O}_2$  measurements at speeds that induced bursting-and-coasting ( $U = 3.75$  and  $4.25 \text{ BL s}^{-1}$ ) into the swimming speed- $\dot{M}\text{O}_2$  relationship did not change these results qualitatively.

## DISCUSSION

We found notable differences in MMR, a key metabolic rate parameter, measured using different respirometry methods (Fig. 1). Previous studies have suggested that resting and swimming respirometry produce similar MMR estimates (Gingerich et al., 2010), with some support from data on the lumpfish *Cyclopterus lumpus* (Killen et al., 2007). Although there was overlap in SMR estimates obtained with different methods, MMR estimated using a  $U_{\text{crit}}$  protocol was significantly higher than MMR obtained using two different exhaustive chase protocols combined with resting respirometry.

Using swimming respirometry, SMR is indirectly measured by extrapolating the swimming speed- $\dot{M}\text{O}_2$  relationship to  $U = 0 \text{ BL s}^{-1}$  (Brett, 1964; Bushnell et al., 1994; Schurmann and Steffensen, 1997). Following this approach, we used three common calculations to estimate SMR, either by averaging 1) the lowest three  $\dot{M}\text{O}_2$  measurements at  $U = 0.75 \text{ BL s}^{-1}$  ( $\text{SMR}_{\text{swim\_low}}$ ), 2) the last three  $\dot{M}\text{O}_2$  measurements at  $U = 0.75 \text{ BL s}^{-1}$  ( $\text{SMR}_{\text{swim\_last}}$ ), or 3) all values in the lowest mode of an  $\dot{M}\text{O}_2$  frequency distribution at  $U = 0.75 \text{ BL s}^{-1}$  ( $\text{SMR}_{\text{swim\_hist}}$ ). Despite different calculations, the three SMR estimates did not significantly differ from each other (Fig. 2) and considerably overlapped  $\text{SMR}_{\text{rest\_low}}$  and  $\text{SMR}_{\text{rest\_hist}}$  estimates (Table 1) when extrapolated based on a three-parameter exponential or power function (Fig. 3B,C).  $\text{SMR}_{\text{rest\_last}}$  differed from the two other SMR estimates in resting

respirometry because spontaneous activity elevated  $\dot{M}O_2$  values in the early morning, towards the end of the trials. This was not the case in swimming respirometry as  $U_{crit}$  trials began shortly before sunrise.

In a study on the Atlantic cod, *Gadus morhua*, Schurmann and Steffensen (1997) found similar results when comparing SMR estimated using both swimming and resting respirometry. Our findings also suggest that SMR can accurately be estimated by extrapolating the swimming speed- $\dot{M}O_2$  relationship obtained from  $U_{crit}$  protocols. Importantly however, when we fit a more simple, two-parameter exponential function to this data, SMR values estimated with the  $U_{crit}$  protocol were ~25% lower than  $SMR_{rest\_low}$ , irrespective of the calculation employed (Table 1, Fig. 3C). This finding is in stark contrast with those of Korsmeyer et al. (2002), who recommend using the traditional two-parameter exponential function. While this simpler, function requires deriving only two constants (Korsmeyer et al., 2002), it may not be the most reliable functional form to extrapolate  $\dot{M}O_2$  beyond the range of swimming speed values measured. In contrast, the hydrodynamics-based power function is believed to overestimate SMR since it places more weight on higher swimming speed values (Videler and Nolet, 1990; Korsmeyer et al., 2002). Our SMR estimates from the hydrodynamics-based power function were higher than estimates from the three-parameter exponential function, but this difference was not significant (Fig. 2).

We obtained higher MMR estimates in the swimming respirometry protocol compared to either exhaustive chase protocols. Several factors may explain this difference. Chasing by an experimenter may not have induced complete exhaustion in *S. bilineatus* even if fish became unresponsive towards the end of the chase. However, the duration of our 15 min protocol greatly exceeded that of typical 1-5 min chases in the published literature (Cutts et al., 2002; Fu et al., 2009; Gingerich et al., 2010; Norin and Malte, 2011; Shultz et al., 2011; Clark et al., 2012). *S. bilineatus* uses its pectoral and caudal fins for swimming and has intermediate to high sustained swimming abilities (Fulton, 2007; Binning et al., 2013). In contrast, many of the fishes that have been subjected to exhaustive chase protocols thus far are body-caudal fin (BCF) swimmers with high unsteady (burst) swimming performance, such as trout (Ferguson and Tufts, 1992; Norin and Malte, 2011), Pacific salmon (Donaldson et al., 2010; Clark et al., 2012), bonefish (Shultz et al., 2011), and bass (Gingerich et al., 2010). Studies suggest that 1-2 min chases are sufficient to achieve complete fatigue in these species (Gingerich et al., 2010; Norin and Malte, 2011; Clark et al., 2012). Rapid exhaustion

most likely occurs because manual chasing induces repetitive burst swimming (Clark et al., 2012), which is powered by white muscle fibres and anaerobic metabolism (Milligan, 1996; Kieffer, 2000). The use of fast, glycolytic muscles for escape swimming explains why these fishes fatigue rapidly and incur large oxygen debts, which can be measured as post-exercise metabolism in the resting respirometry chamber. Alternatively, some BCF swimmers, such as Atlantic salmon (Cutts et al., 2002), carp and catfishes (Fu et al., 2009) can sustain unsteady swimming for longer periods and require chases up to 5 minutes to reach full exhaustion. Pectoral (e.g., Labridae, Scaridae, Pomacentridae, Cichlidae, Embiotocidae) and pectoral-caudal (e.g., Chaetodontidae, Nemipteridae) swimmers may require even longer exhaustive chases, however, as we observed in the case of *S. bilineatus*. Fishes that use their median-paired fins (MPF) for swimming may burst less frequently during chases (e.g., Gotanda et al., 2009) and utilize both red (aerobic) and white (anaerobic) muscle fibres to power their escape. As such, increased use of red muscle could lead to lower oxygen debts and reduced EPOC required to clear metabolites resulting from anaerobic activity. Since the magnitude of EPOC directly influences measurements of MMR in resting respirometry (Reidy et al., 1995), fishes that escape using a combination of white and red muscles will likely display lower  $\dot{M}O_2$  values than fishes relying predominantly on white muscle and anaerobic metabolic pathways. Although swimming respirometry appears to be a better method for measuring MMR in fish that are good steady swimmers, the opposite may be true of fish with better unsteady swimming performance (see Peake and Farrell, 2006). For example, in a study of post-exercise metabolic rates in Atlantic cod, Reidy et al. (1995) found that MMR during recovery after exhaustive chasing significantly exceeded  $\dot{M}O_2$  measurements at  $U_{crit}$ , which is contrary to our results.

Lastly, the short 3 min exhaustive chase and 1 min air exposure protocol yielded higher estimates of MMR than the prolonged 15 min chase. Brief periods of air exposure have been used in a number of studies to simulate fisheries encounters (Ferguson and Tufts, 1992; Donaldson et al., 2010; Clark et al., 2012), and likely push fish beyond their anaerobic threshold, leading to increased EPOC. Given the considerable variability in the duration of fish responses to chase protocols and the likelihood of additional variation from using different chasing techniques and intensity (e.g., tail pinching vs. manual or stick chasing), air exposure may provide a very effective method of standardizing exhaustive chase protocols and improving the accuracy of MMR estimates across species.

## Conclusions and recommendations

Our experiment demonstrated that, for *S. bilineatus*, the  $U_{crit}$  swimming protocol provided a more accurate estimate of MMR than chase protocols combined with resting respirometry. However, because swimming respirometry is impractical for some species (Reidy et al., 1995; Jordan and Steffensen, 2007), chasing followed by air exposure likely provides the best alternative. Furthermore, we found that SMR can accurately be estimated from data obtained using swimming respirometry. However, extrapolating the oxygen consumption curve depends on the functional form used to describe the swimming speed- $\dot{M}O_2$  relationship. As such, resting respirometers provide a reliable measure of SMR with which to compare estimates from  $U_{crit}$  protocols and should be used whenever possible. Additional studies are required to test how data produced with various respirometry methods compare across fish species with different life histories (e.g., demersal vs. pelagic, predatory vs. herbivorous) and swimming behaviours (e.g., pectoral, pectoral-caudal and caudal swimming). However, caution is warranted when comparing results obtained with different approaches, particularly in the case of MMR, unless cross-validation has been performed on a species-specific basis. Bearing in mind these results and the limitations of the methods used, researchers should carefully choose the apparatus and method most appropriate for their species and specific research questions before conducting respirometry studies.

## ACKNOWLEDGEMENTS

We thank C. Layton, C. Juan, L. Strong and staff at the Lizard Island Research Station for field support. Two anonymous reviewers provided useful comments on a previous version of the manuscript. DGR and SAB were supported by the ARC Centre of Excellence for Coral Reef Studies, the Australian National University, The Natural Sciences and Engineering Research Council of Canada, the Ian Potter Doctoral Fellowship at the Lizard Island Research Station (a facility of the Australian Museum) and Total Diving Montréal. JLR was funded by an Australian Research Council Super Science Fellowship and the ARC Centre of Excellence for Coral Reef Studies.

## REFERENCES



- 472 **Barnes, R., King, H. and Carter, C. G.** (2011). Hypoxia tolerance and oxygen regulation in  
 473 Atlantic salmon, *Salmo salar* from a Tasmanian population. *Aquaculture* **318**, 397-  
 474 401.
- 475 **Beamish, F. W. H.** (1978). Swimming capacity. In *Fish physiology* (eds. W. S. Hoar and D.  
 476 J. Randall), vol. 7, pp. 101-187. New York: Academic Press.
- 477 **Bell, W. H. and Terhune, L. D. B.** (1970). Water tunnel design for fisheries research. *J.*  
 478 *Fish. Res. Board Can.* **195**, 1-69.
- 479 **Binning, S. A., Roche, D. G. and Layton, C.** (2013). Ectoparasites increase swimming costs  
 480 in a coral reef fish. *Biol. Lett.* **9**, 20120927.
- 481 **Black, E. C.** (1958). Hyperactivity as a lethal factor in fish. *J. Fish. Res. Board Can.* **15**, 573-  
 482 586.
- 483 **Blazka, P., Volf, M. and Cepela, M.** (1960). A new type of respirometer for the  
 484 determination of the metabolism of fish in an active state. *Physiol. Bohemoslov* **9**,  
 485 553-558.
- 486 **Boaden, A. E. and Kingsford, M. J.** (2012). Diel behaviour and trophic ecology of  
 487 *Scolopsis bilineatus* (Nemipteridae). *Coral Reefs*, 871–883.
- 488 **Bolker, B. M., Brooks, M. E., Clark, C. J., Geange, S. W., Poulsen, J. R., Stevens, M. H.**  
 489 **H. and White, J.-S. S.** (2009). Generalized linear mixed models: a practical guide for  
 490 ecology and evolution. *Trends Ecol. Evol.* **24**, 127-135.
- 491 **Brett, J. R.** (1964). The respiratory metabolism and swimming performance of young  
 492 sockeye salmon. *J. Fish. Res. Board Can.* **21**, 1183-1226.
- 493 **Brett, J. R. and Groves, T. D. D.** (1979). Physiological energetics. In *Fish physiology* (eds.  
 494 W. S. Hoar D. J. Randall and J. R. Brett), vol. 8, pp. 279–352. New York: Academic  
 495 Press.
- 496 **Brick, M. E. and Cech, J. J.** (2002). Metabolic responses of juvenile striped bass to exercise  
 497 and handling stress with various recovery environments. *Trans. Am. Fish. Soc.* **131**,  
 498 855-864.
- 499 **Bushnell, P. G., Steffensen, J. F., Schurmann, H. and Jones, D. R.** (1994). Exercise  
 500 metabolism in two species of cod in arctic waters. *Polar Biol.* **14**, 43-48.
- 501 **Claireaux, G., Couturier, C. and Groison, A. L.** (2006). Effect of temperature on  
 502 maximum swimming speed and cost of transport in juvenile European sea bass  
 503 (*Dicentrarchus labrax*). *J. Exp. Biol.* **209**, 3420-3428.

- 504 **Claireaux, G. and Lefrançois, C.** (2007). Linking environmental variability and fish  
505 performance: integration through the concept of scope for activity. *Philos. Trans. R.*  
506 *Soc. Lond. B Biol. Sci.* **362**, 2031-2041.
- 507 **Clark, T. D., Donaldson, M. R., Pieperhoff, S., Drenner, S. M., Lotto, A., Cooke, S. J.,**  
508 **Hinch, S. G., Patterson, D. A. and Farrell, A. P.** (2012). Physiological benefits of  
509 being small in a changing world: responses of coho salmon (*Oncorhynchus kisutch*) to  
510 an acute thermal challenge and a simulated capture event. *Plos One* **7**, e39079.
- 511 **Clark, T. D., Jeffries, K. M., Hinch, S. G. and Farrell, A. P.** (2011). Exceptional aerobic  
512 scope and cardiovascular performance of pink salmon (*Oncorhynchus gorbuscha*)  
513 may underlie resilience in a warming climate. *J. Exp. Biol.* **214**, 3074-3081.
- 514 **Cutts, C. J., Adams, C. E. and Campbell, A.** (2001). Stability of physiological and  
515 behavioural determinants of performance in Arctic char (*Salvelinus alpinus*). *Can. J.*  
516 *Fish. Aquat. Sci.* **58**, 961-968.
- 517 **Cutts, C. J., Metcalfe, N. B. and Taylor, A. C.** (2002). Juvenile Atlantic salmon (*Salmo*  
518 *salar*) with relatively high standard metabolic rates have small metabolic scopes.  
519 *Funct. Ecol.* **16**, 73-78.
- 520 **Donaldson, M. R., Clark, T. D., Hinch, S. G., Cooke, S. J., Patterson, D. A., Gale, M. K.,**  
521 **Frappell, P. B. and Farrell, A. P.** (2010). Physiological responses of free-swimming  
522 adult Coho salmon to simulated predator and fisheries encounters. *Physiol. Biochem.*  
523 *Zool.* **83**, 973-983.
- 524 **Donelson, J. M., Munday, P. L., McCormick, M. I. and Pitcher, C. R.** (2011). Rapid  
525 transgenerational acclimation of a tropical reef fish to climate change. *Nature Clim.*  
526 *Change* **2**, 30-32.
- 527 **Eliason, E. J., Clark, T. D., Hague, M. J., Hanson, L. M., Gallagher, Z. S., Jeffries, K.**  
528 **M., Gale, M. K., Patterson, D. A., Hinch, S. G. and Farrell, A. P.** (2011).  
529 Differences in thermal tolerance among Sockeye salmon populations. *Science* **332**,  
530 109-112.
- 531 **Farrell, A. P.** (2007). Cardiorespiratory performance during prolonged swimming tests with  
532 salmonids: a perspective on temperature effects and potential analytical pitfalls.  
533 *Philos. Trans. R. Soc. Lond. B Biol. Sci.* **362**, 2017-2030.
- 534 **Farrell, A. P. and Steffensen, J. F.** (1987). An analysis of the energetic cost of the branchial  
535 and cardiac pumps during sustained swimming in trout. *Fish Physiol. Biochem.* **4**, 73-  
536 79.

- 537 **Ferguson, R. A. and Tufts, B. L.** (1992). Physiological effects of brief air exposure in  
538 exhaustively exercised rainbow trout (*Oncorhynchus mykiss*): implications for "catch  
539 and release" fisheries. *Can. J. Fish. Aquat. Sci.* **49**, 1157-1162.
- 540 **Fry, F. E. J.** (1947). Effects of the environment on animal activity. *Publ. Ontario Fish. Res.*  
541 *Lab.* **68**, 1-62.
- 542 **Fry, F. E. J.** (1971). The effect of environmental factors on the physiology of fish. In *Fish*  
543 *physiology* (eds. W. S. Hoar and D. J. Randall), vol. 6, pp. 1-98. New York:  
544 Academic Press.
- 545 **Fry, F. E. J. and Hart, J. S.** (1948). Cruising speed of goldfish in relation to water  
546 temperature. *J. Fish. Res. Board. Can.* **7**, 169-175.
- 547 **Fu, S. J., Cao, Z. D. and Peng, J. L.** (2006). Effect of meal size on postprandial metabolic  
548 response in Chinese catfish (*Silurus asotus* Linnaeus). *J. Comp. Physiol. B.* **176**, 489-  
549 495.
- 550 **Fu, S. J., Zeng, L. Q., Li, X. M., Pang, X., Cao, Z. D., Peng, J. L. and Wang, Y. X.**  
551 (2009). The behavioural, digestive and metabolic characteristics of fishes with  
552 different foraging strategies. *J. Exp. Biol.* **212**, 2296-2302.
- 553 **Fulton, C. J.** (2007). Swimming speed performance in coral reef fishes: field validations  
554 reveal distinct functional groups. *Coral Reefs* **26**, 217-228.
- 555 **Gingerich, A. J., Philipp, D. P. and Suski, C. D.** (2010). Effects of nutritional status on  
556 metabolic rate, exercise and recovery in a freshwater fish. *J. Comp. Physiol. B.* **180**,  
557 371-384.
- 558 **Gotanda, K. M., Turgeon, K. and Kramer, D. L.** (2009). Body size and reserve protection  
559 affect flight initiation distance in parrotfishes. *Behav. Ecol. Sociobiol.* **63**, 1563-1572.
- 560 **Hemmingsen, E. A. and Douglas, E. L.** (1970). Respiratory characteristics of the  
561 hemoglobin-free fish *Chaenocephalus aceratus*. *Comp. Biochem. Physiol.* **33**, 733-  
562 744.
- 563 **Johansen, J. L. and Jones, G. P.** (2011). Increasing ocean temperature reduces the  
564 metabolic performance and swimming ability of coral reef damselfishes. *Glob.*  
565 *Change Biol.* **17**, 2971-2979.
- 566 **Johansen, J. L., Vaknin, R., Steffensen, J. F. and Domenici, P.** (2010). Kinematics and  
567 energetic benefits of schooling in the labriform fish, striped surfperch *Embiotoca*  
568 *lateralis*. *Mar. Ecol. Prog. Ser.* **420**, 221-229.
- 569 **Jordan, A. D. and Steffensen, J. F.** (2007). Effects of ration size and hypoxia on specific  
570 dynamic action in the cod. *Physiol. Biochem. Zool.* **80**, 178-185.

- 571 **Kieffer, J. D.** (2000). Limits to exhaustive exercise in fish. *Comp. Biochem. Physiol. Part A*  
572 *Mol. Integr. Physiol.* **126**, 161-179.
- 573 **Kieffer, J. D.** (2010). Perspective - Exercise in fish: 50+ years and going strong. *Comp.*  
574 *Biochem. Physiol. Part A Mol. Integr. Physiol.* **156**, 163-168.
- 575 **Killen, S. S., Costa, I., Brown, J. A. and Gamperl, A. K.** (2007). Little left in the tank:  
576 metabolic scaling in marine teleosts and its implications for aerobic scope. *Proc. R.*  
577 *Soc. Biol. Sci. Ser. B* **274**, 431-438.
- 578 **Korsmeyer, K. E. and Dewar, H.** (2001). Tuna metabolism and energetics. In *Fish*  
579 *physiology* (eds. B. Block and E. Stevens), vol. 19, pp. 35-78. New York: Academic  
580 Press.
- 581 **Korsmeyer, K. E., Steffensen, J. F. and Herskin, J.** (2002). Energetics of median and  
582 paired fin swimming, body and caudal fin swimming, and gait transition in parrotfish  
583 (*Scarus schlegeli*) and triggerfish (*Rhinecanthus aculeatus*). *J. Exp. Biol.* **205**, 1253-  
584 1263.
- 585 **Milligan, C. L.** (1996). Metabolic recovery from exhaustive exercise in rainbow trout. *Comp.*  
586 *Biochem. Physiol. Part A Physiol.* **113**, 51-60.
- 587 **Munday, P. L., McCormick, M. I. and Nilsson, G. E.** (2012). Impact of global warming  
588 and rising CO<sub>2</sub> levels on coral reef fishes: what hope for the future? *J. Exp. Biol.* **215**,  
589 3865-3873.
- 590 **Niimi, A. J. and Beamish, F. W. H.** (1974). Bioenergetics and growth of largemouth bass  
591 (*Micropterus salmoides*) in relation to body weight and temperature. *Can. J. Zool.* **52**,  
592 447-456.
- 593 **Nilsson, G. E., Crawley, N., Lunde, I. G. and Munday, P. L.** (2009). Elevated temperature  
594 reduces the respiratory scope of coral reef fishes. *Glob. Change Biol.* **15**, 1405-1412.
- 595 **Nilsson, G. E. and Ostlund-Nilsson, S.** (2004). Hypoxia in paradise: widespread hypoxia  
596 tolerance in coral reef fishes. *Proc. R. Soc. Biol. Sci. Ser. B* **271**, S30-S33.
- 597 **Nilsson, G. E., Östlund-Nilsson, S. and Munday, P. L.** (2010). Effects of elevated  
598 temperature on coral reef fishes: loss of hypoxia tolerance and inability to acclimate.  
599 *Comp. Biochem. Physiol. Part A Mol. Integr. Physiol.* **156**, 389-393.
- 600 **Norin, T. and Malte, H.** (2011). Repeatability of standard metabolic rate, active metabolic  
601 rate and aerobic scope in young brown trout during a period of moderate food  
602 availability. *J. Exp. Biol.* **214**, 1668-1675.

- Peake, S. J. and Farrell, A. P.** (2004). Locomotory behaviour and post-exercise physiology in relation to swimming speed, gait transition and metabolism in free-swimming smallmouth bass (*Micropterus dolomieu*). *J. Exp. Biol.* **207**, 1563-1575.
- Peake, S. J. and Farrell, A. P.** (2006). Fatigue is a behavioural response in respirometer-confined smallmouth bass. *J. Fish Biol.* **68**, 1742-1755.
- Plaut, I.** (2001). Critical swimming speed: its ecological relevance. *Comp. Biochem. Physiol. Part A Mol. Integr. Physiol.* **131**, 41-50.
- R Development Core Team.** (2010). R: A language and environment for statistical computing. R Foundation for Statistical Computing, Vienna, Austria. ISBN 3-900051-07-0, URL <http://www.R-project.org>.
- Reidy, S. P., Kerr, S. R. and Nelson, J. A.** (2000). Aerobic and anaerobic swimming performance of individual Atlantic cod. *J. Exp. Biol.* **203**, 347-357.
- Reidy, S. P., Nelson, J. A., Tang, Y. and Kerr, S. R.** (1995). Post exercise metabolic rate in Atlantic cod and its dependence upon the method of exhaustion. *J. Fish Biol.* **47**, 377-386.
- Roche, D. G., Strong, L. E. and Binning, S. A.** (In press). Prevalence of the parasitic cymothoid isopod *Anilocra nemipteri* on its fish host at Lizard Island, Great Barrier Reef. *Aust. J. Zool.*
- Schurmann, H. and Steffensen, J. F.** (1997). Effects of temperature, hypoxia and activity on the metabolism of juvenile Atlantic cod. *J. Fish Biol.* **50**, 1166-1180.
- Sepulveda, C. and Dickson, K. A.** (2000). Maximum sustainable speeds and cost of swimming in juvenile kawakawa tuna (*Euthynnus affinis*) and chub mackerel (*Scomber japonicus*). *J. Exp. Biol.* **203**, 3089-3101.
- Shultz, A. D., Murchie, K. J., Griffith, C., Cooke, S. J., Danylchuk, A. J., Goldberg, T. L. and Suski, C. D.** (2011). Impacts of dissolved oxygen on the behavior and physiology of bonefish: implications for live-release angling tournaments. *J. Exp. Mar. Biol. Ecol.* **402**, 19-26.
- Steffensen, J. F.** (1989). Some errors in respirometry of aquatic breathers: how to avoid and correct them. *Fish Physiol. Biochem.* **6**, 49-59.
- Steffensen, J. F.** (2005). Respiratory Systems and Metabolic Rates. In *Fish physiology* (eds. A. P. Farrell and J. F. Steffensen), vol. 22, pp. 203-238. New York: Academic Press.
- Steffensen, J. F., Bushnell, P. G. and Schurmann, H.** (1994). Oxygen consumption in four species of teleosts from Greenland: no evidence of metabolic cold adaptation. *Polar Biol.* **14**, 49-54.

637 **Steffensen, J. F., Johansen, K. and Bushnell, P. G.** (1984). An automated swimming  
638 respirometer. *Comp. Biochem. Physiol. Part A Physiol.* **79**, 437-440.

639 **Svendsen, J. C., Steffensen, J. F., Aarestrup, K., Frisk, M., Etzerodt, A. and Jyde, M.**  
640 (2012). Excess posthypoxic oxygen consumption in rainbow trout (*Oncorhynchus*  
641 *mykiss*): recovery in normoxia and hypoxia. *Can. J. Zool.* **90**, 1-11.

642 **Svendsen, J. C., Tudorache, C., Jordan, A. D., Steffensen, J. F., Aarestrup, K. and**  
643 **Domenici, P.** (2010). Partition of aerobic and anaerobic swimming costs related to  
644 gait transitions in a labriform swimmer. *J. Exp. Biol.* **213**, 2177-2183.

645 **Teal, J. M. and Carey, F. G.** (1967). Skin respiration and oxygen debt in the mudskipper  
646 *Periophthalmus sobrinus*. *Copeia* **3**, 677-679.

647 **Videler, J. J.** (1993). Fish swimming. London: Chapman & Hall.

648 **Videler, J. J. and Nolet, B. A.** (1990). Costs of swimming measured at optimum speed: scale  
649 effects, differences between swimming styles, taxonomic groups and submerged and  
650 surface swimming. *Comp. Biochem. Physiol. Part A Physiol.* **97**, 91-99.

651 **Webb, P. W.** (1975). Hydrodynamics and energetics of fish propulsion. *Bull. Fish. Res. Bd.*  
652 *Can.* **190**, 159.

653 **Wu, T. Y.** (1977). Introduction to the scaling of aquatic animal locomotion. In *Scale effects*  
654 *in animal locomotion* (ed. T. J. Pedley), pp. 203–232. New York: Academic Press.

655

656



**Table 1.** *P* values from LMM contrasts between SMR obtained in resting respirometry ( $\text{SMR}_{\text{rest}}$ ) and swimming respirometry ( $\text{SMR}_{\text{swim}}$ ).  $\text{SMR}_{\text{swim}}$  was calculated using three different functional forms: a two-parameter exponential function (exp 2), a three-parameter exponential function (exp 3), and a three-parameter power function (power 3). Three different calculation methods were used for all SMR estimates: by averaging 1) the three lowest  $\dot{M}\text{O}_2$  determinations (low), 2) the three last  $\dot{M}\text{O}_2$  determinations (last), and 3)  $\dot{M}\text{O}_2$  values in the lowest mode of an  $\dot{M}\text{O}_2$  frequency distribution (hist). Significance is denoted by \* with  $\alpha = 0.05$ .

| $\text{SMR}_{\text{rest}}$ | $\text{SMR}_{\text{swim}}$ exp 2 |         |         | $\text{SMR}_{\text{swim}}$ exp 3 |       |       | $\text{SMR}_{\text{swim}}$ power 3 |      |       |
|----------------------------|----------------------------------|---------|---------|----------------------------------|-------|-------|------------------------------------|------|-------|
|                            | low                              | last    | hist    | low                              | last  | hist  | low                                | last | hist  |
| low                        | <0.01*                           | <0.01*  | 0.01*   | 0.24                             | 0.89  | 0.5   | 0.78                               | 0.13 | 0.052 |
| last                       | <0.001*                          | <0.001* | <0.001* | <0.001*                          | 0.01* | 0.04* | 0.02*                              | 0.22 | 0.44  |
| hist                       | <0.001*                          | <0.001* | <0.001* | 0.04*                            | 0.44  | 0.82  | 0.54                               | 0.55 | 0.29  |

## FIGURE LEGENDS

**Fig. 1** A) Maximum metabolic rate (MMR) for 10 *S. bilineatus* obtained with three different methods: 1) in a swim respirometer ( $\text{MMR}_{\text{swim}}$ ), 2) in a resting respirometer after a 15 min exhaustive chase trial ( $\text{MMR}_{\text{chase}}$ ), and 3) in a resting respirometer after a three min exhaustive chase trial followed by one min air exposure ( $\text{MMR}_{\text{air}}$ ); B) Paired difference between  $\text{MMR}_{\text{swim}}$  and  $\text{MMR}_{\text{chase}}$  as well as  $\text{MMR}_{\text{air}}$ , controlling for the non-independence of measurements on the same fish. Error bars are s.e.m.

**Fig. 2** A) Standard metabolic rate (SMR) for 10 *S. bilineatus* obtained with two different respirometry methods and three distinct calculations: first, in a resting respirometer (resting) by averaging 1) the three lowest  $\dot{M}\text{O}_2$  determinations (low, light grey bar), 2) the three last  $\dot{M}\text{O}_2$  determinations (last, grey bar), and 3)  $\dot{M}\text{O}_2$  values in the lowest mode of a  $\dot{M}\text{O}_2$  frequency distribution (hist, dark grey bar); second, in a swimming respirometer (swim) by extrapolating the swimming speed- $\dot{M}\text{O}_2$  relationship to a speed of zero after averaging 1) the three lowest  $\dot{M}\text{O}_2$  determinations at  $U=0.75 \text{ BL s}^{-1}$  (low, light grey bar), 2) the three last  $\dot{M}\text{O}_2$  determinations at  $U=0.75 \text{ BL s}^{-1}$  (last, grey bar), and 3)  $\dot{M}\text{O}_2$  values in the lowest mode of a  $\dot{M}\text{O}_2$  frequency distribution at  $U=0.75 \text{ BL s}^{-1}$  (hist, dark grey bar). Three different functional forms were fitted to the swimming speed- $\dot{M}\text{O}_2$  relationship in swimming respirometry: a two-parameter exponential function (swim exp 2), a three-parameter exponential function (swim exp 3) and a three-parameter power function (swim power 3). B) Paired differences controlling for the non-independence of measurements on the same fish using  $\text{SMR}_{\text{rest\_low}}$  as a contrast. Error bars are s.e.m.

**Fig. 3** The relationship between the rate of oxygen consumption ( $\dot{M}\text{O}_2$ ) and swimming speed ( $U$ ) for the coral reef fish, *S. bilineatus* ( $n=10$ ). SMR estimates were calculated by extrapolation of A) a two-parameter exponential function (turquoise line;  $\dot{M}\text{O}_2 = 62.9 (\pm 6.45 \text{ s.e.m.}) * 10^{0.21(\pm 0.02) U}$ ,  $r^2 = 0.77$ ); B) a three-parameter exponential function (blue line;  $\dot{M}\text{O}_2 = 77.72 (\pm 25.70 \text{ s.e.m.}) + 14.12 (\pm 11.50 \text{ s.e.m.}) * 10^{0.38(\pm 0.10) U}$ ,  $r^2 = 0.78$ ); and C) a three-parameter power function (red line;  $\dot{M}\text{O}_2 = 104.13 (\pm 11.99 \text{ s.e.m.}) + 7.26 (\pm 4.75 \text{ s.e.m.}) * U^{2.86(\pm 0.54)}$ ,  $r^2 = 0.78$ ). Intercepts are slightly different from those displayed in Fig. 2, which are mean intercepts for ten relationships. Solid lines indicate relationships based on aerobic swimming only ( $0.75 \leq U \leq 3.25 \text{ BL s}^{-1}$ ); broken lines indicate extrapolations to  $U = 0 \text{ BL s}^{-1}$  and beyond  $U = 3.25 \text{ BL s}^{-1}$ , at speeds that resulted in bursting-and-coasting (anaerobic

701 metabolism). Symbols are described in the legend and error bars are s.e.m. Values of SMR  
702 are offset at  $U = 0 \text{ BL s}^{-1}$  to avoid overlap. Mean  $U_{\text{crit}}$  is shown as a vertical solid line with  
703 broken grey lines indicating s.e.m. Sample sizes are  $n = 10$  at  $U \leq 3.25 \text{ BL s}^{-1}$ ,  $n = 9$  at  $U =$   
704  $3.75 \text{ BL s}^{-1}$  and  $n = 3$  at  $U = 4.25 \text{ BL s}^{-1}$ .

705

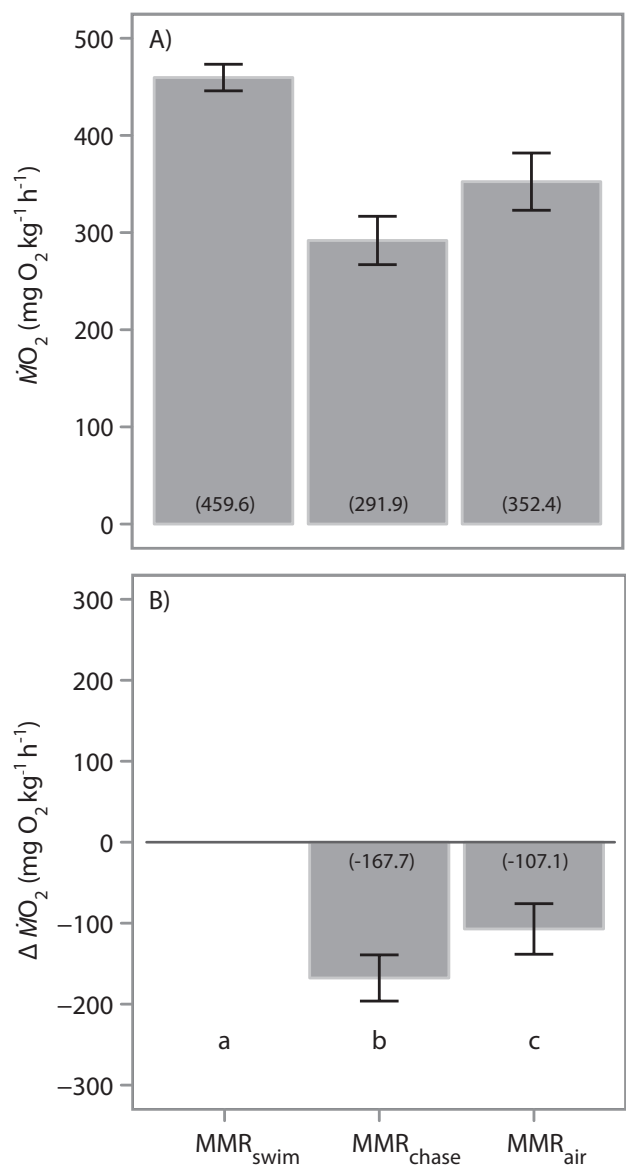

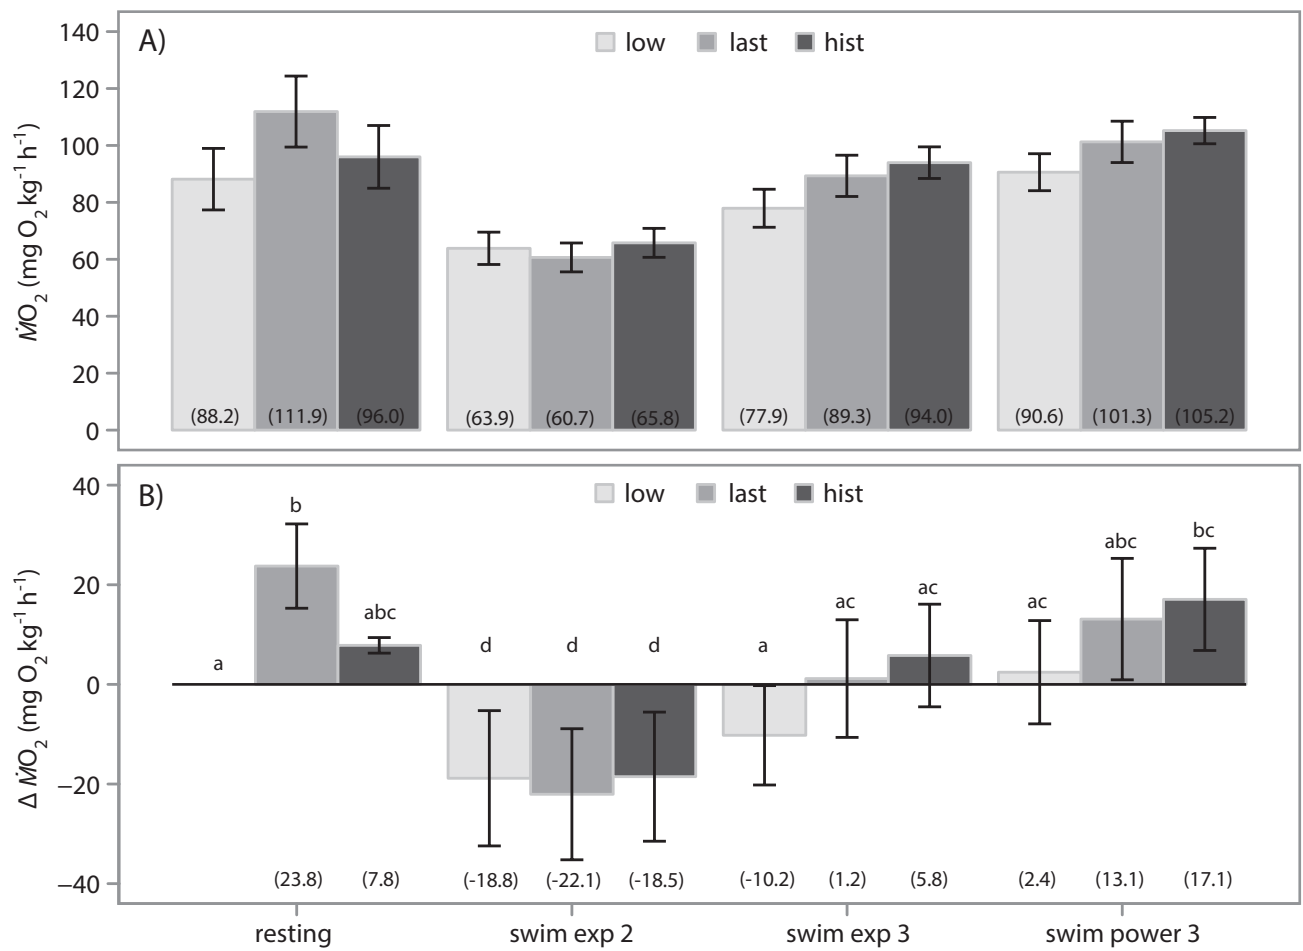

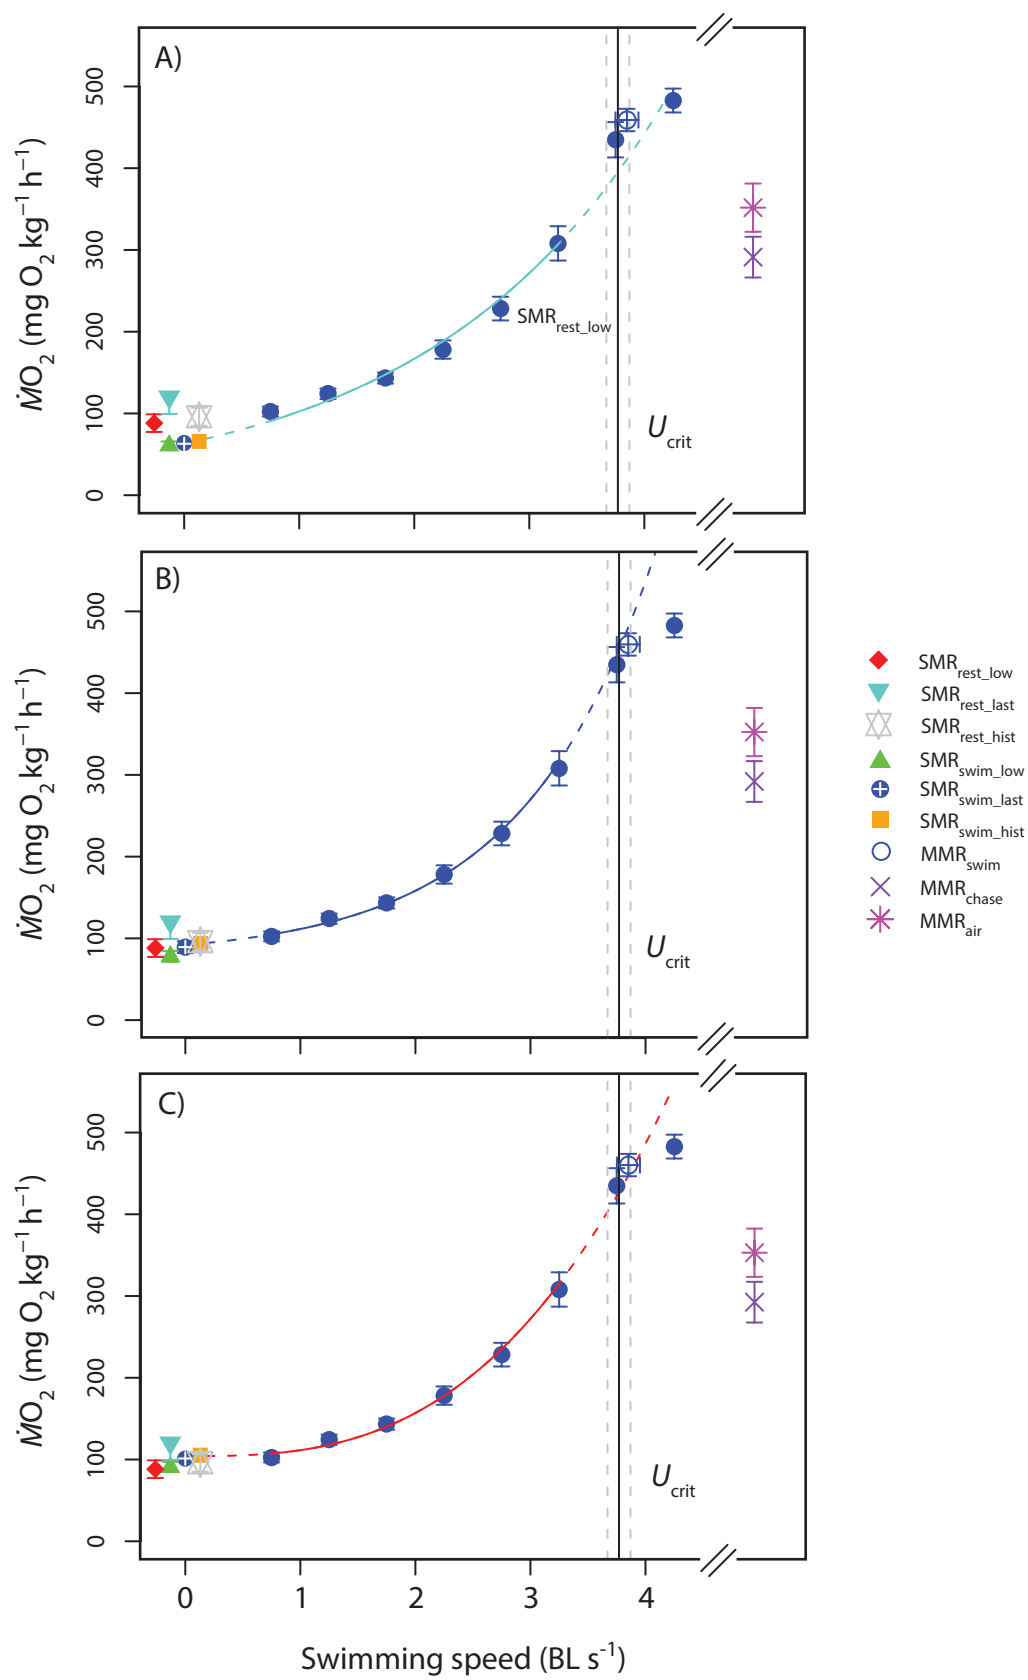

Source: https://cob.silverchair.com/jeb/article-pdf/doi/10.1242/jeb.082925/2036943/jeb_082925.pdf
